# Supplementary material for: Fermi-level shift, electron separation, and plasmon resonance change in Ag nanoparticle-decorated TiO2 under UV light illumination
Source: Royal Society of Chemistry journal article supplement (doi:10.1039/d3cp00899a), 2023-01-01
Supplement: d3cp00899a1.pdf [file d3cp00899a1.pdf]

# Photoinduced Fermi-level Shift, Electron Separation, and Plasmon Resonance Change of the Ag/TiO<sub>2</sub> photocatalyst under Gaseous Conditions

,

Wenhao Zhao,<sup>a</sup> Liping Wen,<sup>b</sup> Ivan P. Parin, Xiujian Zhao, <sup>a</sup>Baoshun Liu,<sup>a</sup>

<sup>a</sup>State Key laboratory of silicate Materials for Architectures, Wuhan University of Technology,

Wuhan City, Hubei Province, P. R. China

<sup>b</sup>School of Environmental & Biological Engineering, Wuhan Technology and Business University,

Wuhan city, Hubei province, 430065, P. R. China

<sup>c</sup>Department of Chemistry, Materials Chemistry Centre, University College London, London

WC1H 0AJ, U.K.

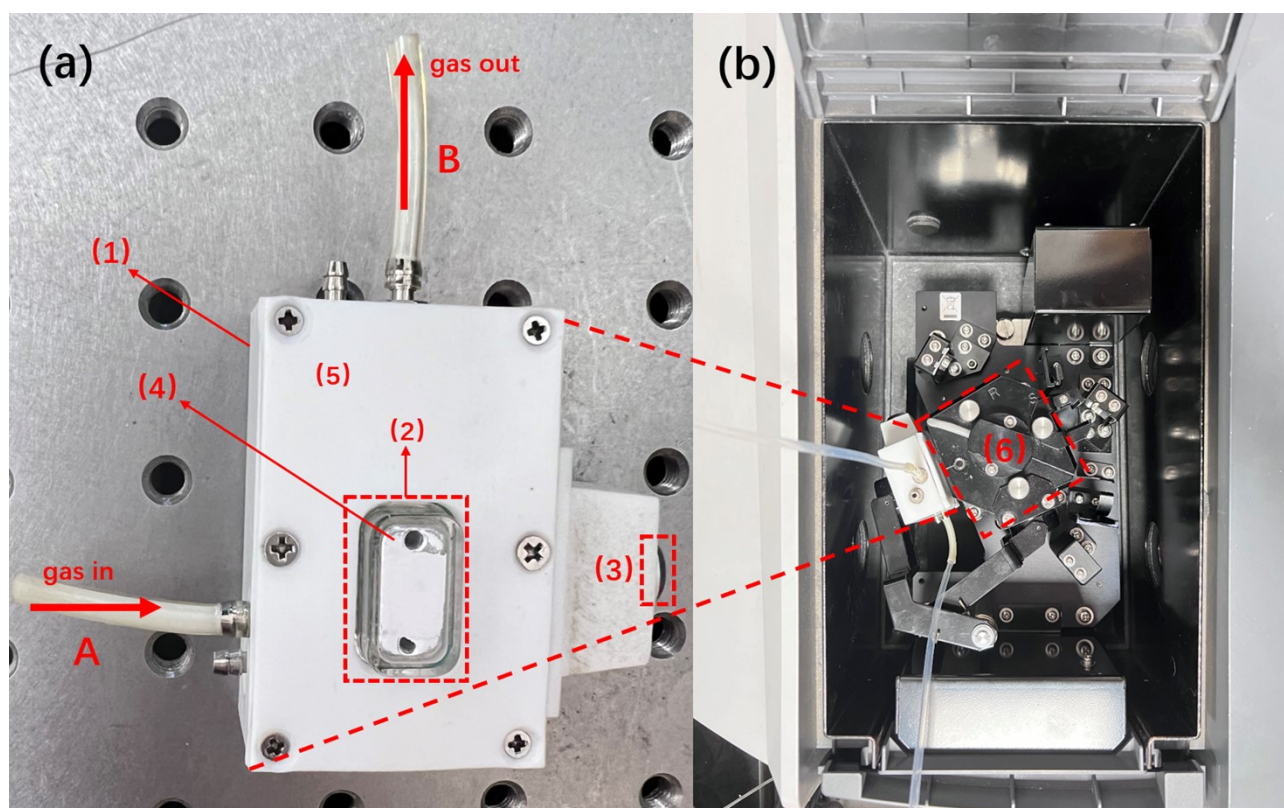

Fig. S1 (a) Digital picture of the sample stage; (b) Digital picture of the sample stage equipped in a Shimadzu optical integration sphere. The sample stage consists of the base (1) and a sample cell (2). The heating element is in the sample stage, which is connected to a temperature control system through interface (3). The sample cell is cover with a small transparent quartz cup (4) to form a closed chamber. Atmosphere gas can flow into the chamber from inlet A, which flows through enclosed sample cell, and flow out through the outlet B. For measurement, the sample powder was firstly pressed into the sample cell (2), which was then over with the quartz cup (4), and then was fixed with the PTFE cover (5). The size of the transparent quartz cup that covered the sample can be inserted into the integration optical sphere (6), as shown in Fig. S1(b). During the measurement, the temperature of the sample stage wa heated and controlled by a temperature controller through the interface (3). The atmosphere gas was controlled by a glass rotameter to slowly flow through the enclosed sample.

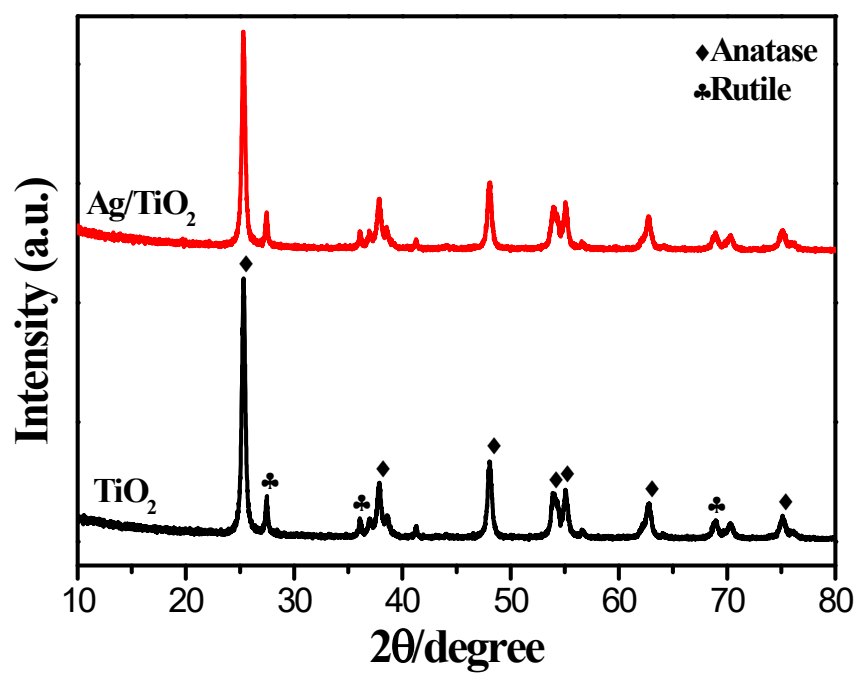

Fig. S2 XRD patterns of the undecorated TiO<sub>2</sub> and Ag/TiO<sub>2</sub> samples

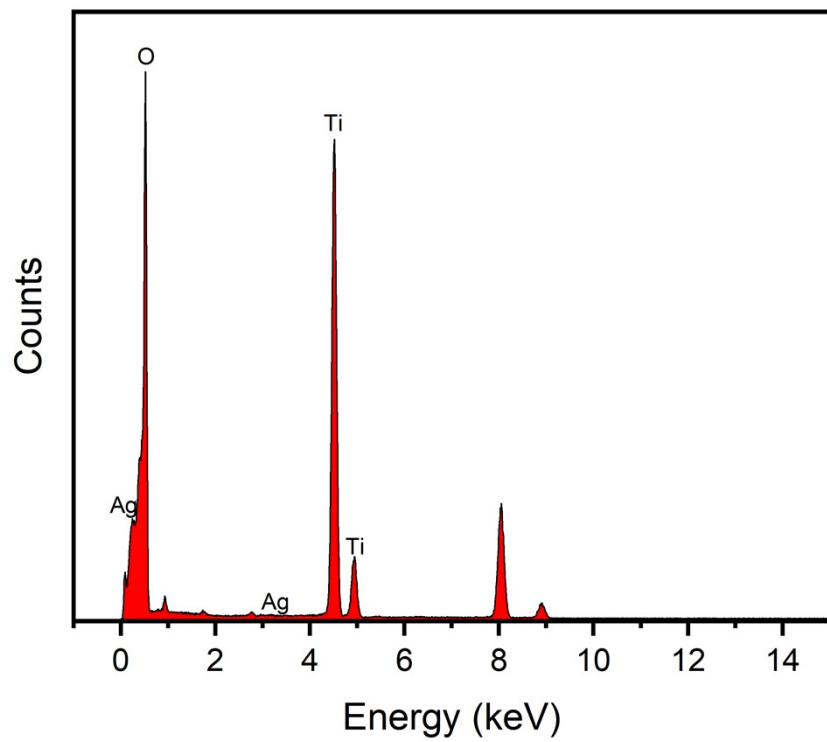

Fig. S3. EDX element analysis of the Ag/TiO<sub>2</sub>

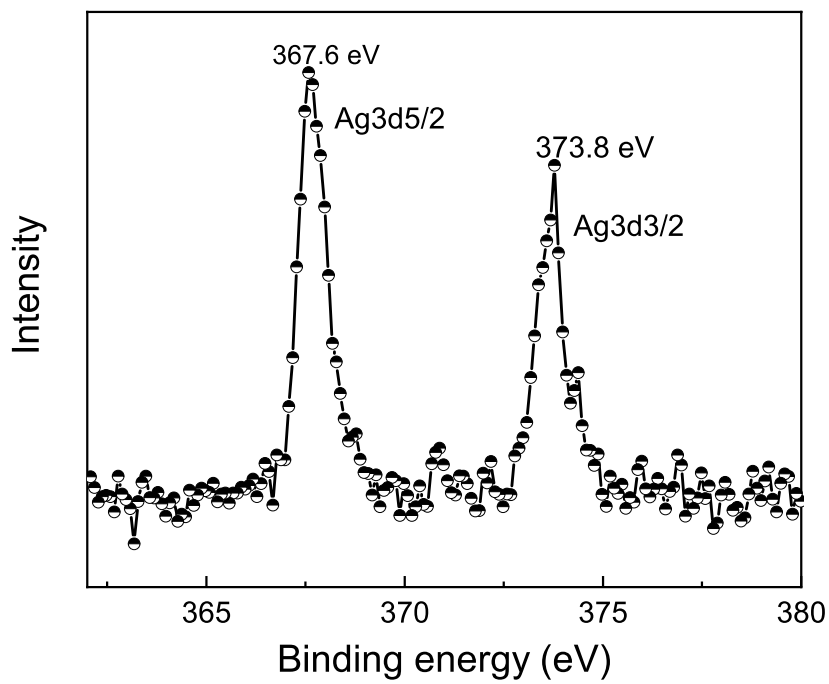

Fig. S4 Ag3d high-resolution XPS spectrum of L-Ag/TiO<sub>2</sub>

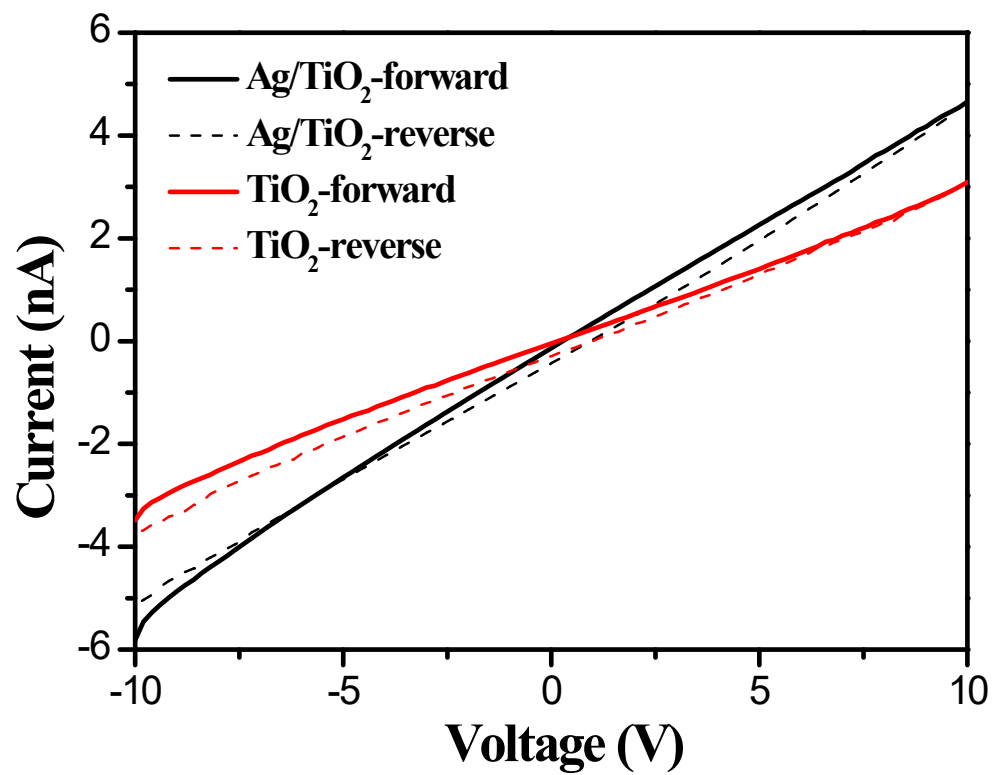

Fig. S5 V-I curves of the pristine TiO<sub>2</sub> and L-Ag/TiO<sub>2</sub>

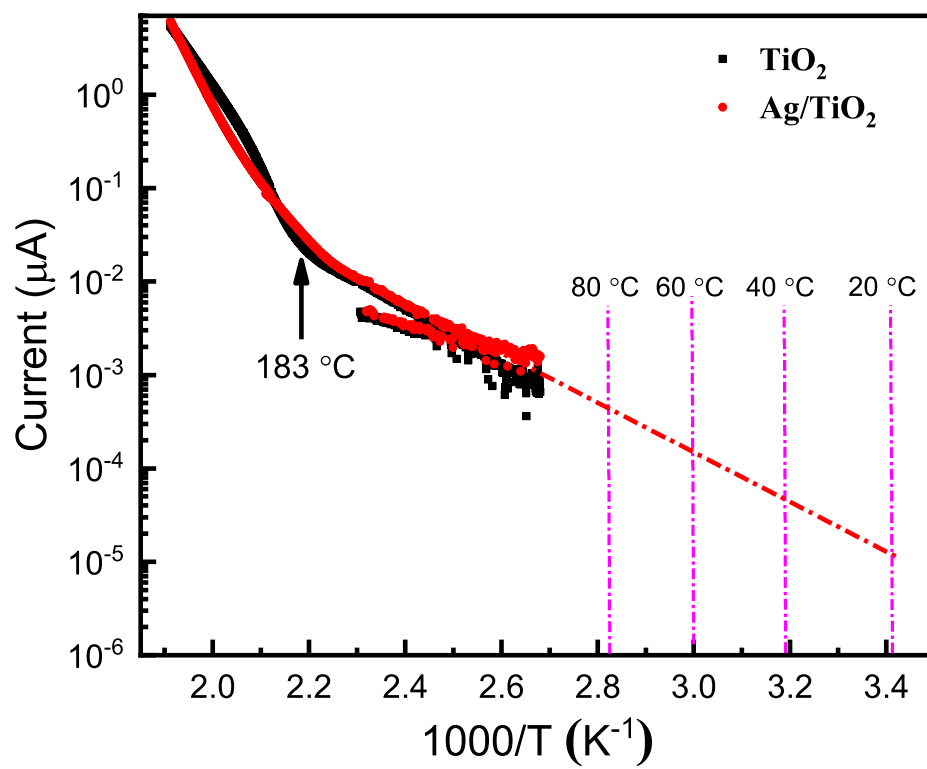

Fig. S6 Temperature-dependent dark currents of the TiO<sub>2</sub> and Ag/TiO<sub>2</sub>

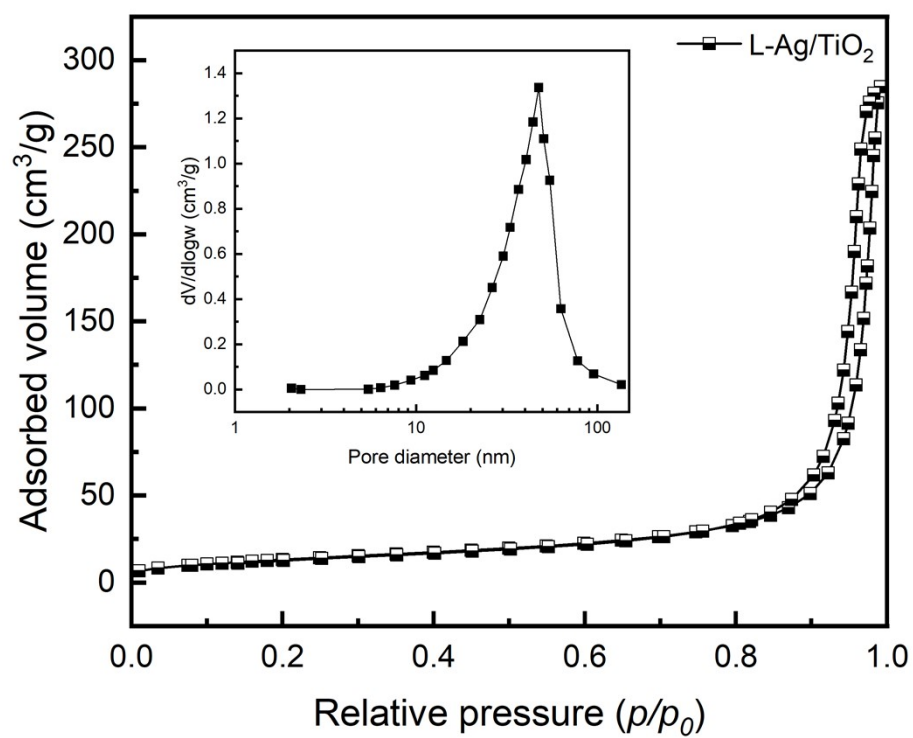

Fig. S7. BET isotherm N<sub>2</sub> sorption curves of the Ag/TiO<sub>2</sub> (inset show the pore distribution)



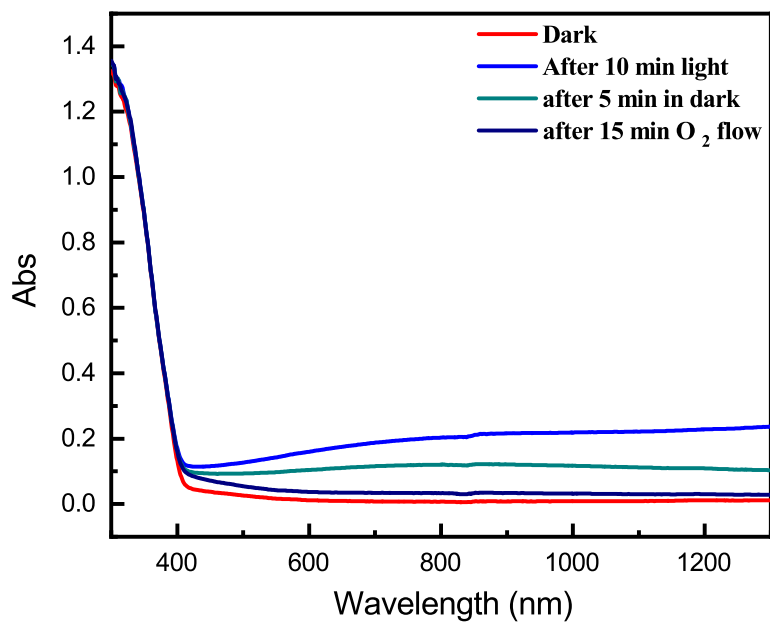

Fig. S8 Absorption spectra of the pristine TiO<sub>2</sub> before and after 375 nm laser irradiation in methanol contained N<sub>2</sub> atmosphere under different conditions;
